# Supplementary material for: Structural basis of HapEP88L-linked antifungal triazole resistance in Aspergillus fumigatus
Source: PubMed Central journal article supplement (PMC7266990; doi:10.26508/lsa.202000729), 2020-05-28

Source Data for Figure 1

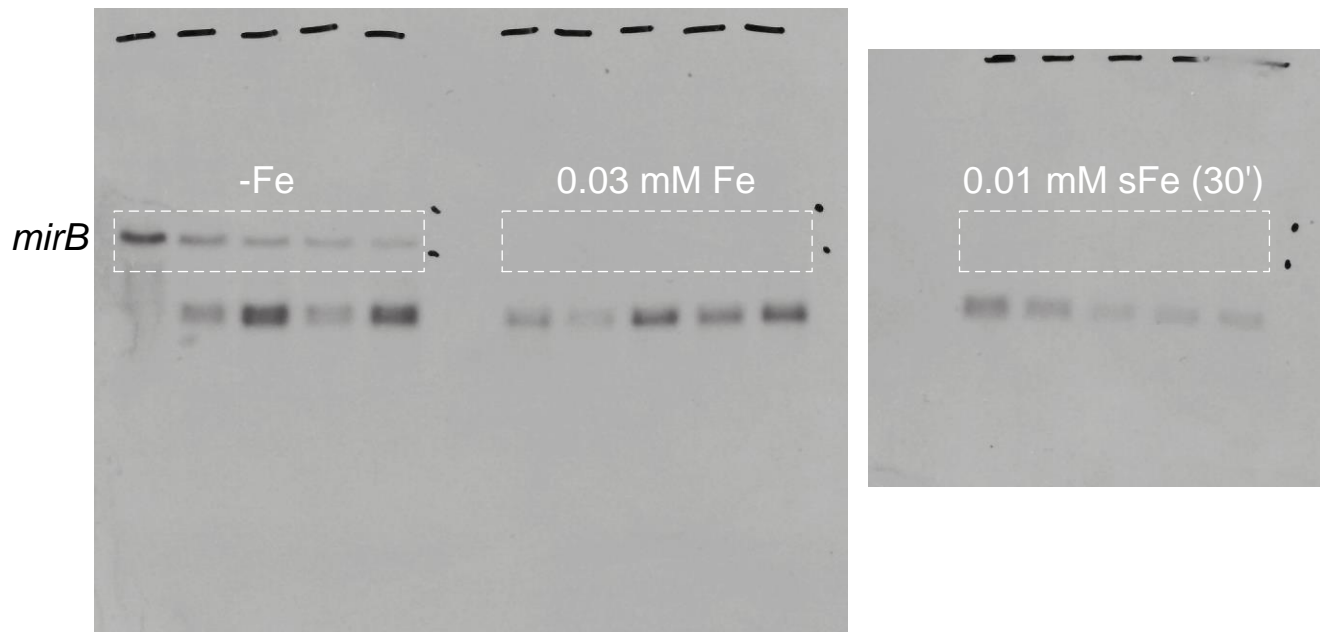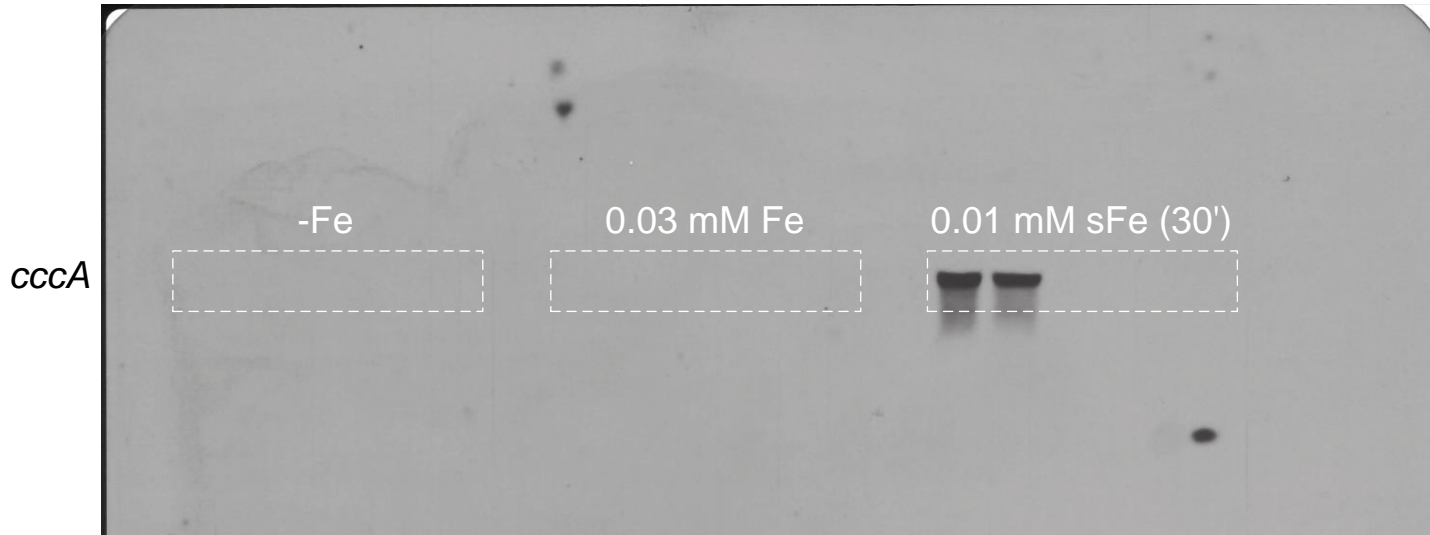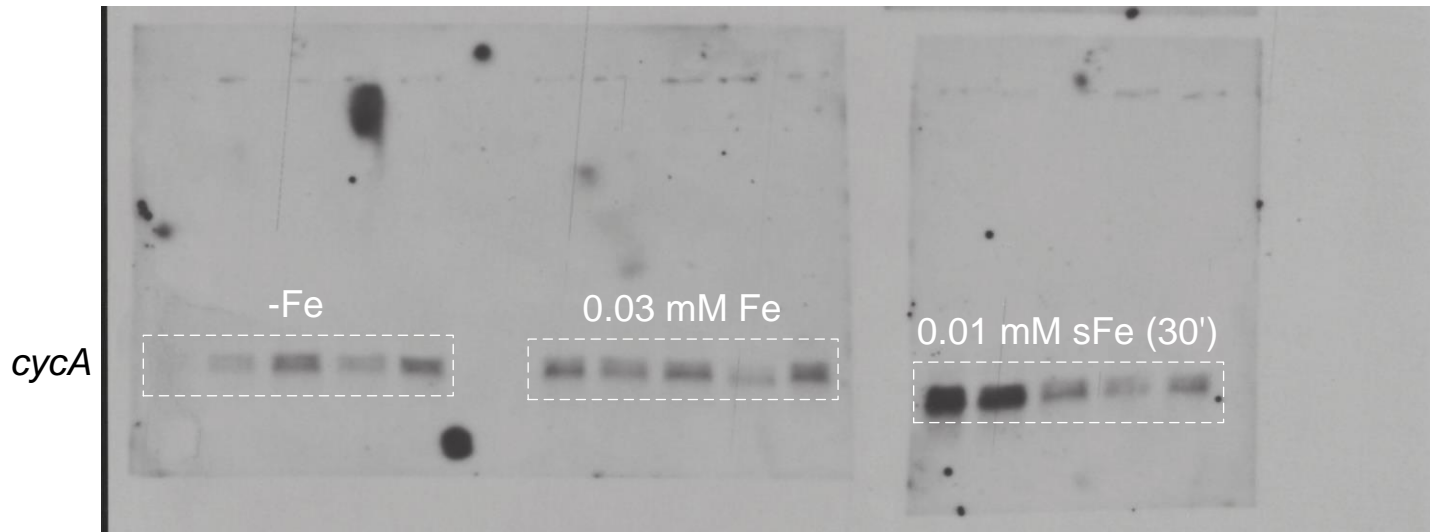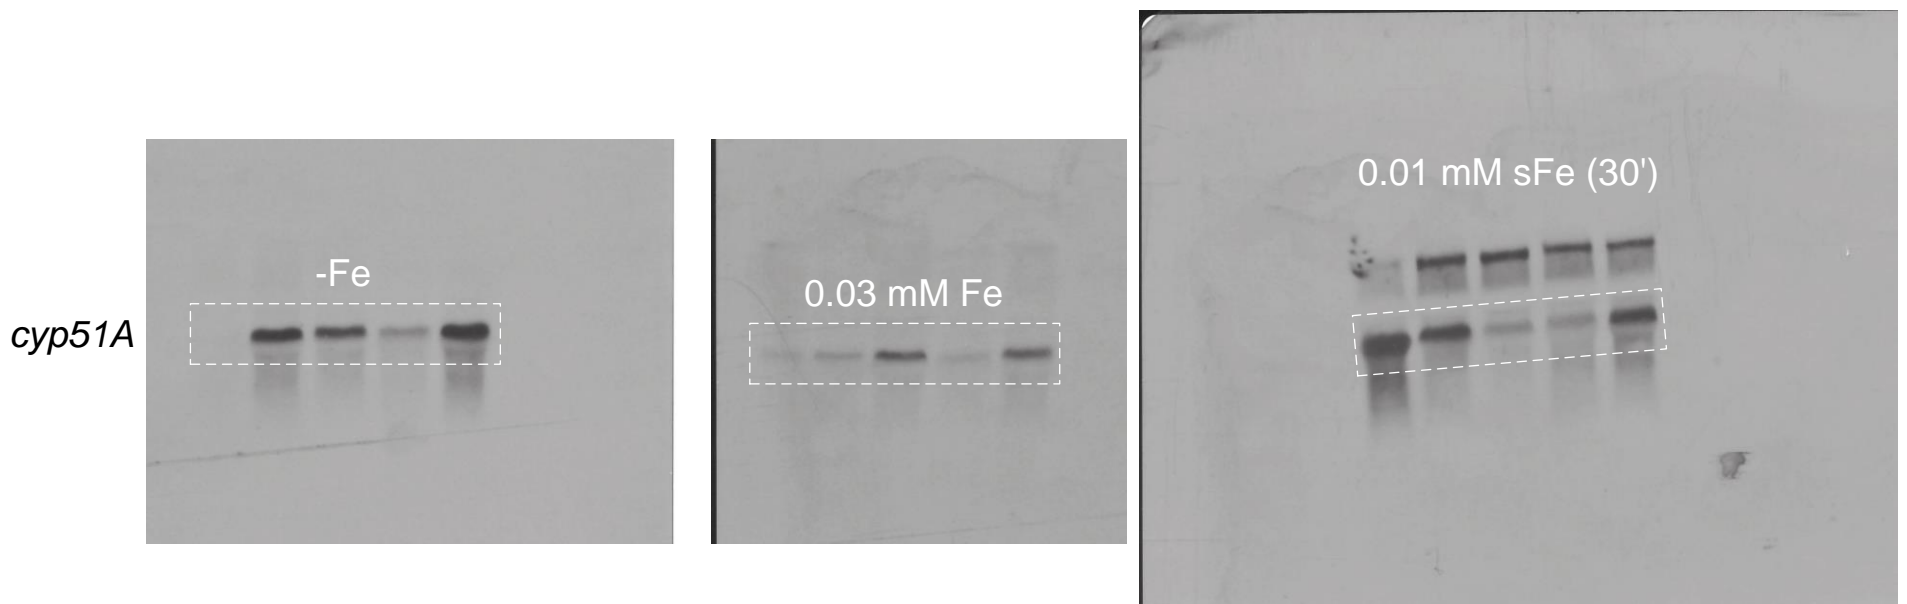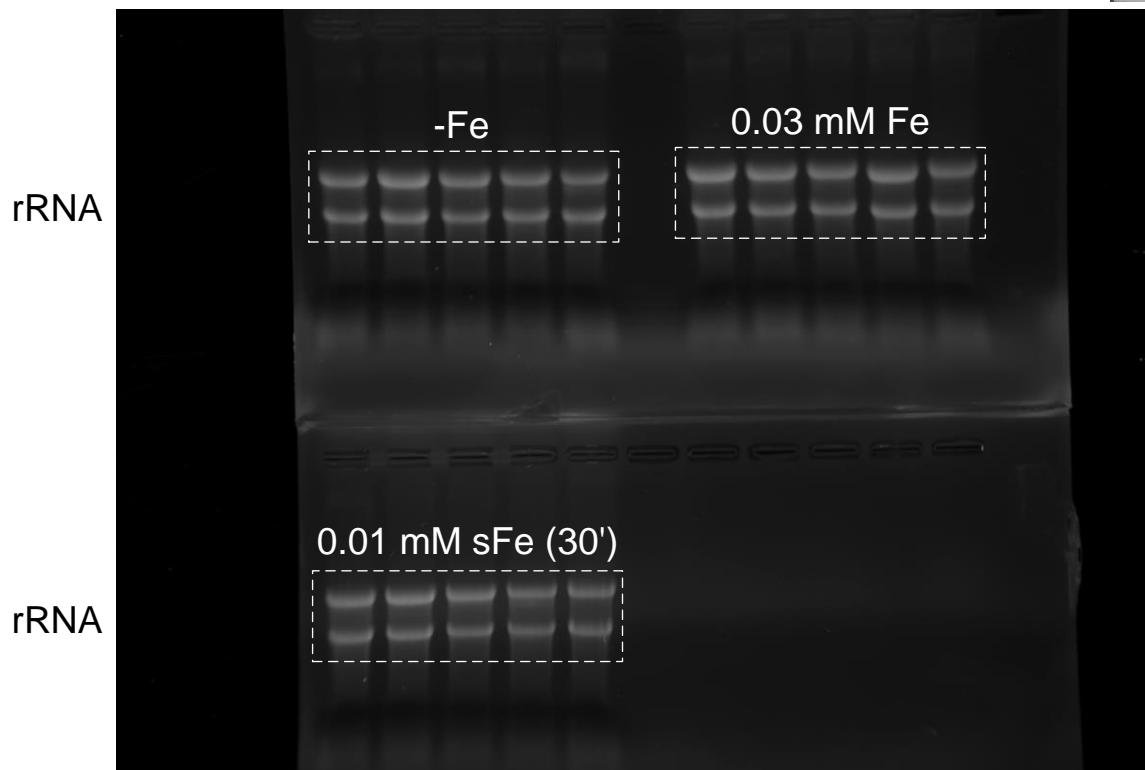

Supplement: LSA-2020-00729_SdataF1.pdf [file LSA-2020-00729_SdataF1.pdf]
